# Supplementary material for: Global birth prevalence and mortality from inborn errors of metabolism: a systematic analysis of the evidence
Source: PubMed Central journal article supplement (PMC6237105; doi:10.7189/jogh.08.021102), 2018-12
Supplement: jogh-08-021102-s001.pdf [file jogh-08-021102-s001.pdf]

## Online Supplementary Document

Waters et al. Global birth prevalence and mortality from inborn errors of metabolism.

J Glob Health 2018;8:021102

### Appendix 1: Search terms used for literature search

#### A 1.1: Search terms used for literature search (MEDLINE)

| #  | Searches                                                                                                                                                                                                                                                                                                                                                                                                                                                                                                                                                                                              | Hits    |
|----|-------------------------------------------------------------------------------------------------------------------------------------------------------------------------------------------------------------------------------------------------------------------------------------------------------------------------------------------------------------------------------------------------------------------------------------------------------------------------------------------------------------------------------------------------------------------------------------------------------|---------|
| 1  | exp vital statistics/ or exp incidence/                                                                                                                                                                                                                                                                                                                                                                                                                                                                                                                                                               | 689447  |
| 2  | (incidence* or prevalence* or morbidity or mortality).tw.                                                                                                                                                                                                                                                                                                                                                                                                                                                                                                                                             | 1296484 |
| 3  | (disease adj3 burden).tw.                                                                                                                                                                                                                                                                                                                                                                                                                                                                                                                                                                             | 11981   |
| 4  | exp "cost of illness"/                                                                                                                                                                                                                                                                                                                                                                                                                                                                                                                                                                                | 18825   |
| 5  | exp quality-adjusted life years/                                                                                                                                                                                                                                                                                                                                                                                                                                                                                                                                                                      | 7483    |
| 6  | QALY.tw.                                                                                                                                                                                                                                                                                                                                                                                                                                                                                                                                                                                              | 4182    |
| 7  | Disability adjusted life years.mp.                                                                                                                                                                                                                                                                                                                                                                                                                                                                                                                                                                    | 983     |
| 8  | (initial adj2 burden).tw.                                                                                                                                                                                                                                                                                                                                                                                                                                                                                                                                                                             | 194     |
| 9  | exp risk factors/                                                                                                                                                                                                                                                                                                                                                                                                                                                                                                                                                                                     | 593406  |
| 10 | 1 or 2 or 3 or 4 or 5 or 6 or 7 or 8 or 9                                                                                                                                                                                                                                                                                                                                                                                                                                                                                                                                                             | 1990285 |
| 11 | metabolism, inborn errors/ or exp amino acid metabolism, inborn errors/ or exp amino acid transport disorders, inborn/ or exp amyloidosis, familial/ or exp brain diseases, metabolic, inborn/ or exp carbohydrate metabolism, inborn errors/ or exp hyperbilirubinemia, hereditary/ or exp lipid metabolism, inborn errors/ or exp lysosomal storage diseases/ or exp metal metabolism, inborn errors/ or exp peroxisomal disorders/ or exp porphyrias/ or exp purine-pyrimidine metabolism, inborn errors/ or exp renal tubular transport, inborn errors/ or exp steroid metabolism, inborn errors/ | 144169  |
| 12 | congenital metabolic disorders.mp. [mp=title, abstract, original title, name of substance word, subject heading word, keyword heading word, protocol supplementary concept word, rare disease supplementary concept word, unique identifier]                                                                                                                                                                                                                                                                                                                                                          | 77      |
| 13 | inherited metabolic disorders.mp. [mp=title, abstract, original title, name of substance word, subject heading word, keyword heading word, protocol supplementary concept word, rare disease supplementary concept word, unique identifier]                                                                                                                                                                                                                                                                                                                                                           | 405     |
| 14 | 11 or 12 or 13                                                                                                                                                                                                                                                                                                                                                                                                                                                                                                                                                                                        | 144323  |
| 15 | 10 and 14                                                                                                                                                                                                                                                                                                                                                                                                                                                                                                                                                                                             | 12761   |
| 16 | limit 15 to (yr="1980 -Current" and "all child (0 to 18 years)")                                                                                                                                                                                                                                                                                                                                                                                                                                                                                                                                      | 4872    |

## A 1.2: Search terms used for literature search (EMBASE)

| #  | Searches                                                                                                                                                                                                                                                                                                                                                                                                                                                                                                                                                                                              | Hits    |
|----|-------------------------------------------------------------------------------------------------------------------------------------------------------------------------------------------------------------------------------------------------------------------------------------------------------------------------------------------------------------------------------------------------------------------------------------------------------------------------------------------------------------------------------------------------------------------------------------------------------|---------|
| 1  | exp vital statistics/ or exp incidence/                                                                                                                                                                                                                                                                                                                                                                                                                                                                                                                                                               | 282502  |
| 2  | (incidence* or prevalence* or morbidity or mortality).tw.                                                                                                                                                                                                                                                                                                                                                                                                                                                                                                                                             | 1831362 |
| 3  | (disease adj3 burden).tw.                                                                                                                                                                                                                                                                                                                                                                                                                                                                                                                                                                             | 19994   |
| 4  | exp "cost of illness"/                                                                                                                                                                                                                                                                                                                                                                                                                                                                                                                                                                                | 15304   |
| 5  | exp quality-adjusted life years/                                                                                                                                                                                                                                                                                                                                                                                                                                                                                                                                                                      | 13770   |
| 6  | QALY.tw.                                                                                                                                                                                                                                                                                                                                                                                                                                                                                                                                                                                              | 8215    |
| 7  | Disability adjusted life years.mp.                                                                                                                                                                                                                                                                                                                                                                                                                                                                                                                                                                    | 1466    |
| 8  | (initial adj2 burden).tw.                                                                                                                                                                                                                                                                                                                                                                                                                                                                                                                                                                             | 291     |
| 9  | exp risk factors/                                                                                                                                                                                                                                                                                                                                                                                                                                                                                                                                                                                     | 673443  |
| 10 | 1 or 2 or 3 or 4 or 5 or 6 or 7 or 8 or 9                                                                                                                                                                                                                                                                                                                                                                                                                                                                                                                                                             | 2393629 |
| 11 | metabolism, inborn errors/ or exp amino acid metabolism, inborn errors/ or exp amino acid transport disorders, inborn/ or exp amyloidosis, familial/ or exp brain diseases, metabolic, inborn/ or exp carbohydrate metabolism, inborn errors/ or exp hyperbilirubinemia, hereditary/ or exp lipid metabolism, inborn errors/ or exp lysosomal storage diseases/ or exp metal metabolism, inborn errors/ or exp peroxisomal disorders/ or exp porphyrias/ or exp purine-pyrimidine metabolism, inborn errors/ or exp renal tubular transport, inborn errors/ or exp steroid metabolism, inborn errors/ | 1161746 |
| 12 | congenital metabolic disorders.mp. [mp=title, abstract, subject headings, heading word, drug trade name, original title, device manufacturer, drug manufacturer, device trade name, keyword]                                                                                                                                                                                                                                                                                                                                                                                                          | 93      |
| 13 | inherited metabolic disorders.mp. [mp=title, abstract, subject headings, heading word, drug trade name, original title, device manufacturer, drug manufacturer, device trade name, keyword]                                                                                                                                                                                                                                                                                                                                                                                                           | 659     |
| 14 | 11 or 12 or 13                                                                                                                                                                                                                                                                                                                                                                                                                                                                                                                                                                                        | 1161948 |
| 15 | 10 and 14                                                                                                                                                                                                                                                                                                                                                                                                                                                                                                                                                                                             | 261090  |
| 16 | limit 15 to (yr="1980 -Current" and child <unspecified age>)                                                                                                                                                                                                                                                                                                                                                                                                                                                                                                                                          | 17130   |

### A 1.3: Search terms used for literature search (Global Health)

| #  | Searches                                                                                                                    | Hits   |
|----|-----------------------------------------------------------------------------------------------------------------------------|--------|
| 1  | exp vital statistics/ or exp incidence/                                                                                     | 121400 |
| 2  | (incidence* or prevalence* or morbidity or mortality).tw.                                                                   | 391951 |
| 3  | (disease adj3 burden).tw.                                                                                                   | 6599   |
| 4  | exp "cost of illness"/                                                                                                      | 0      |
| 5  | exp quality-adjusted life years/                                                                                            | 0      |
| 6  | QALY.tw.                                                                                                                    | 799    |
| 7  | Disability adjusted life years.mp.                                                                                          | 830    |
| 8  | (initial adj2 burden).tw.                                                                                                   | 24     |
| 9  | exp risk factors/                                                                                                           | 132753 |
| 10 | 1 or 2 or 3 or 4 or 5 or 6 or 7 or 8 or 9                                                                                   | 470049 |
| 11 | congenital metabolic disorders.mp. [mp=abstract, title, original title, broad terms, heading words, identifiers, cabicodes] | 12     |
| 12 | inherited metabolic disorders.mp. [mp=abstract, title, original title, broad terms, heading words, identifiers, cabicodes]  | 79     |
| 13 | exp congenital metabolic anomalies/ or exp metabolic disorders/                                                             | 82264  |
| 14 | 11 or 12 or 13                                                                                                              | 82288  |
| 15 | 10 and 14                                                                                                                   | 29353  |
| 16 | limit 15 to yr="1980 -Current"                                                                                              | 29168  |
| 17 | exp children/                                                                                                               | 185225 |
| 18 | 16 and 17                                                                                                                   | 3034   |

## Appendix 2. Quality grading

For the quality grading, a modified Grading of Recommendations Assessment, Development and Evaluation (GRADE) guidelines was adapted. Studies were graded as follows:

- o High quality: Studies with the entire four criteria, or any three including “study design”, highlighted above well represented;
- o Moderate quality: Studies with any three of the four criteria, or any two including “study design”, highlighted above well represented;
- o Low quality: Studies with any two of the four criteria, or “study design” only, highlighted above well represented; and
- o Very low quality: Studies with only one (excluding “study design”) or none of the four criteria highlighted above well represented.

### Appendix 3: Meta-estimates of specific IEM

#### A 3.1. Meta-estimate of incidence of all amino acid disorders

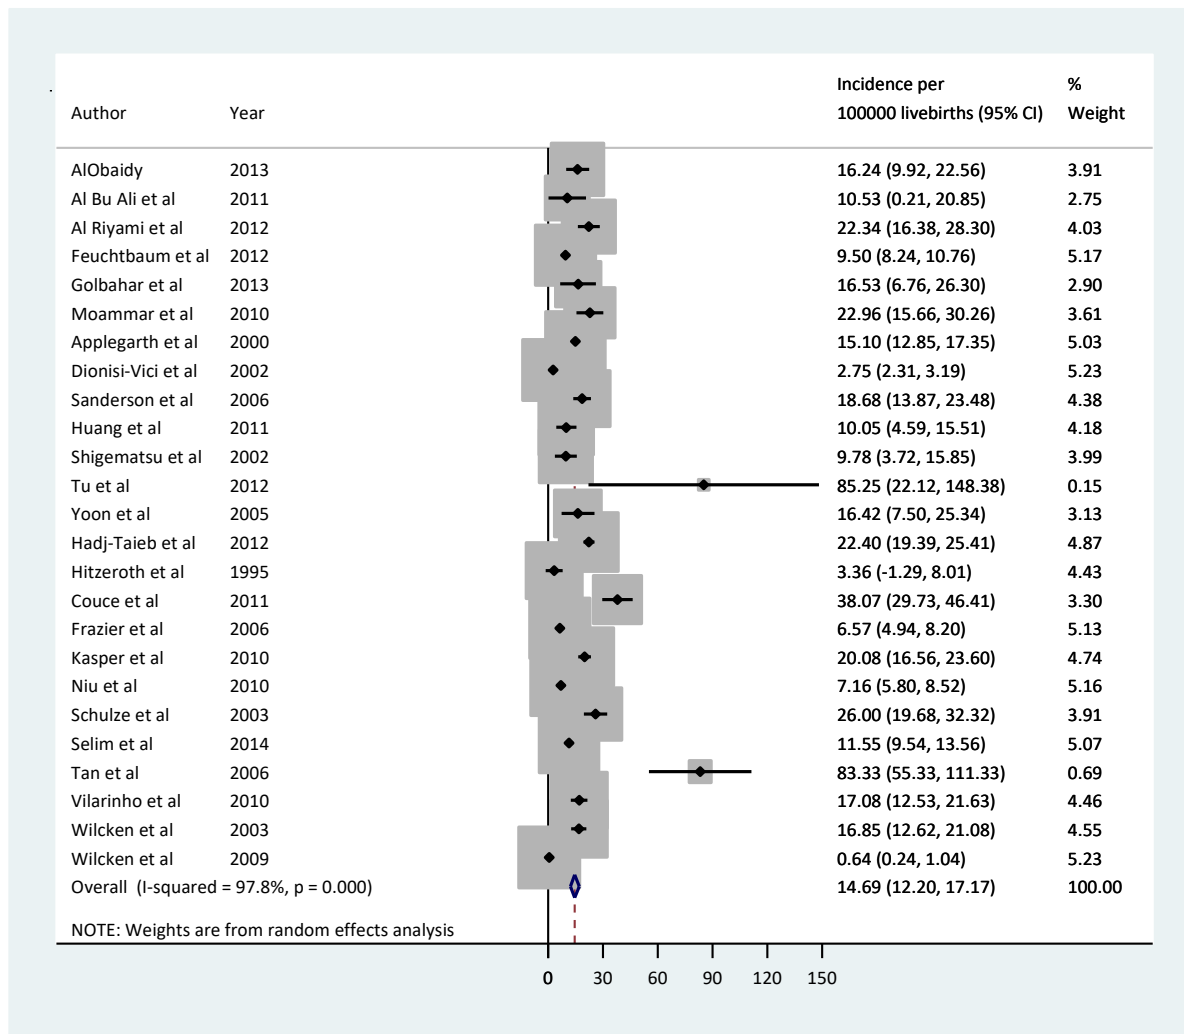

### A 3.2. Meta-estimate of incidence of phenylketonuria

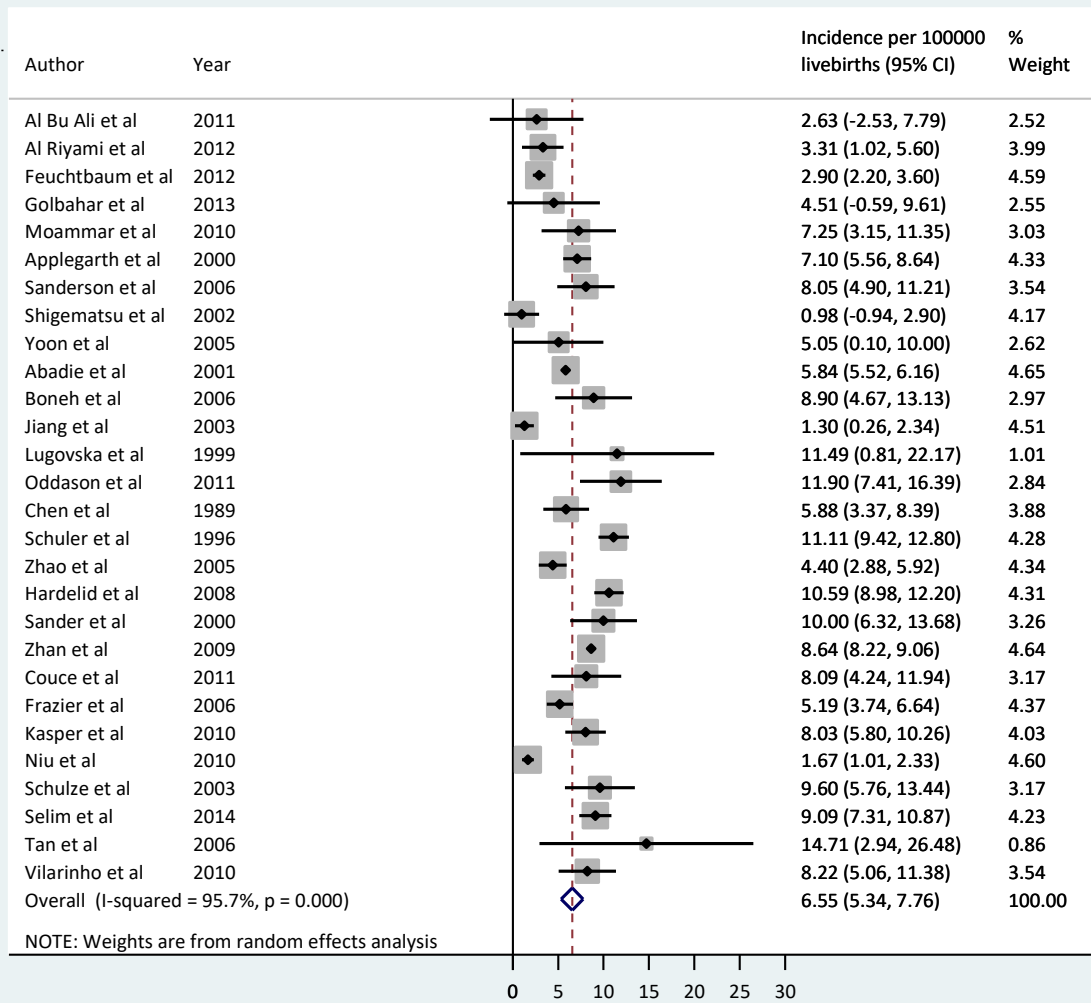

### A 3.3. Meta-estimate of incidence of maple syrup urine disease

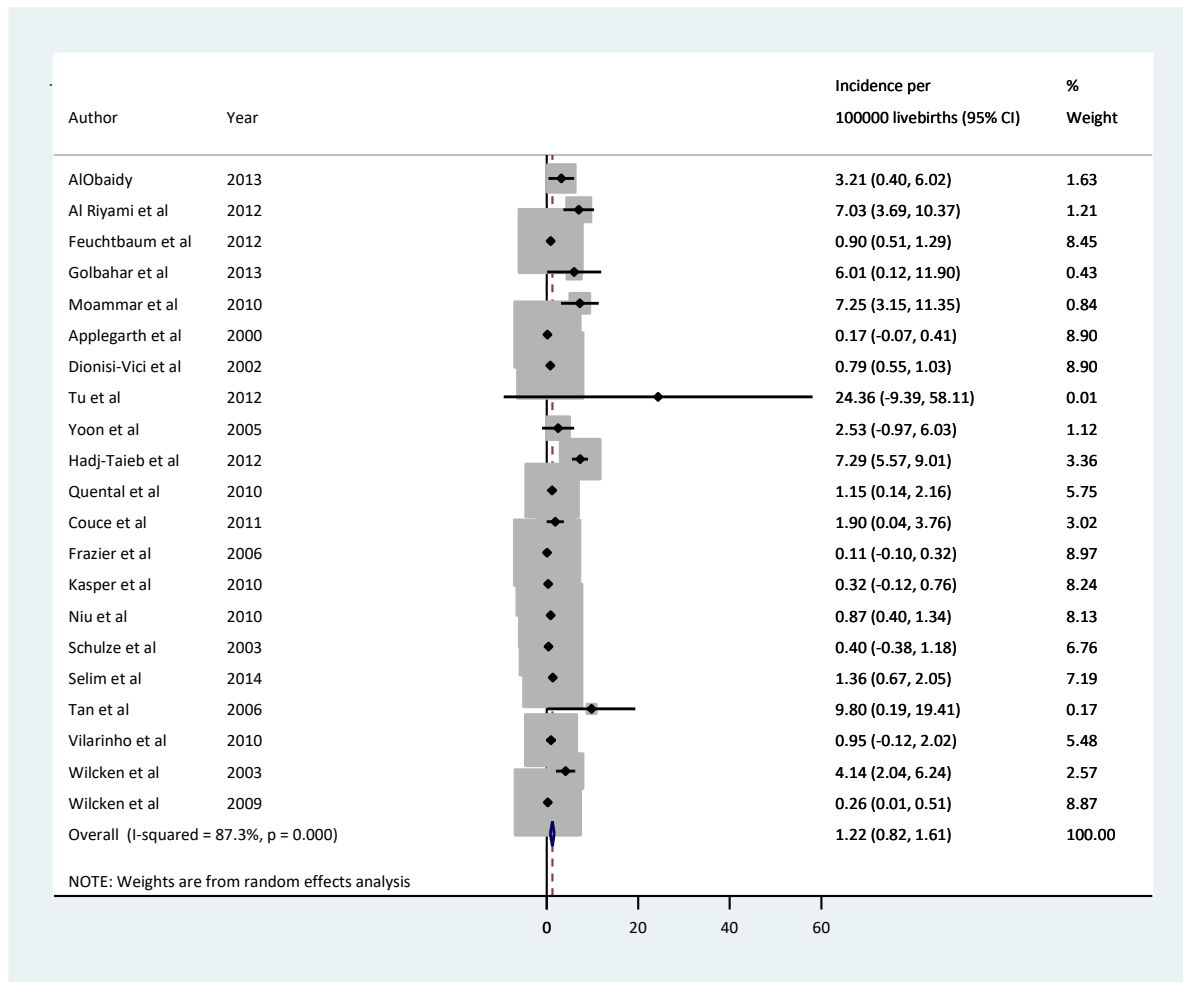

### A 3.4. Meta-estimate of incidence of homocystinuria

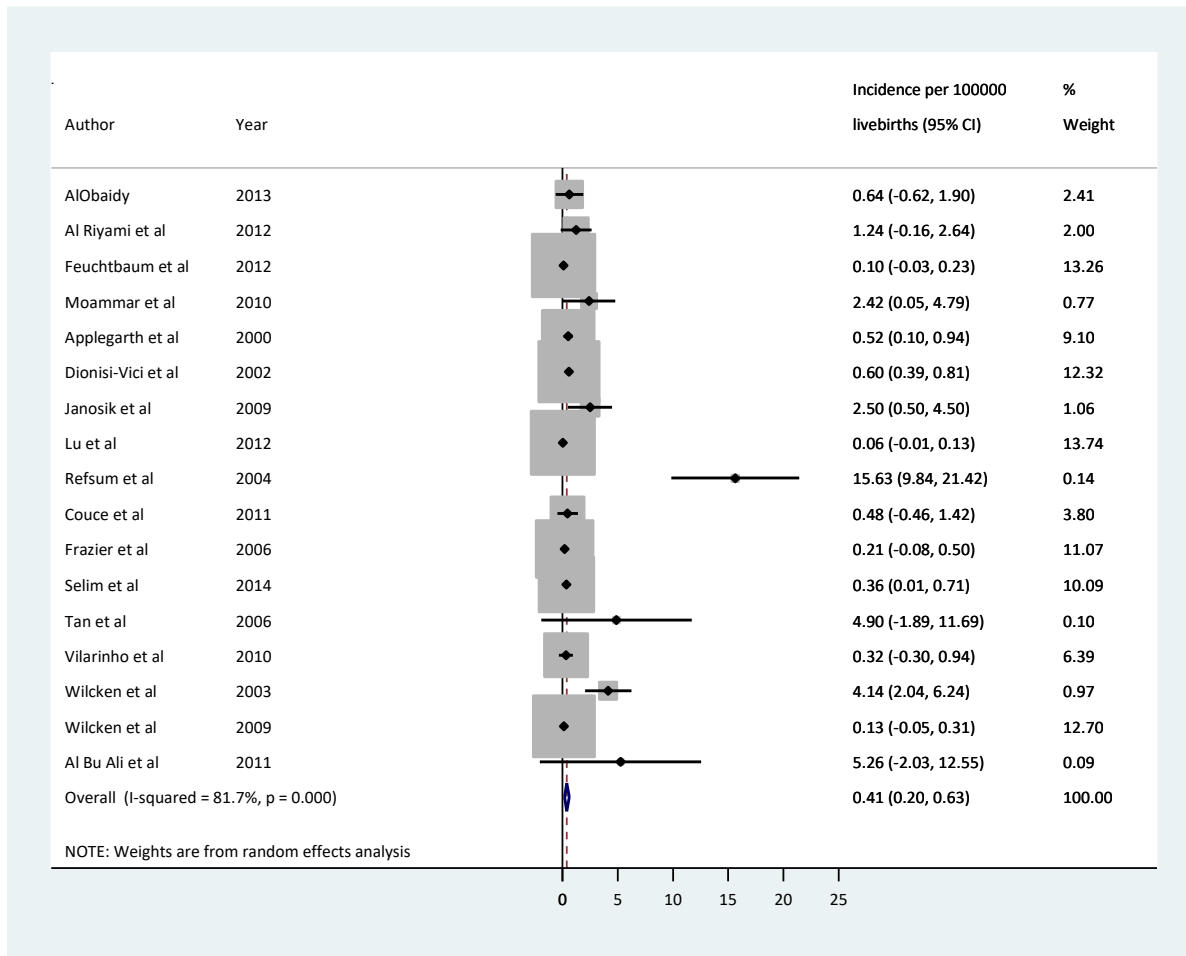



### A 3.5. Meta-estimate of incidence of all organic acidurias

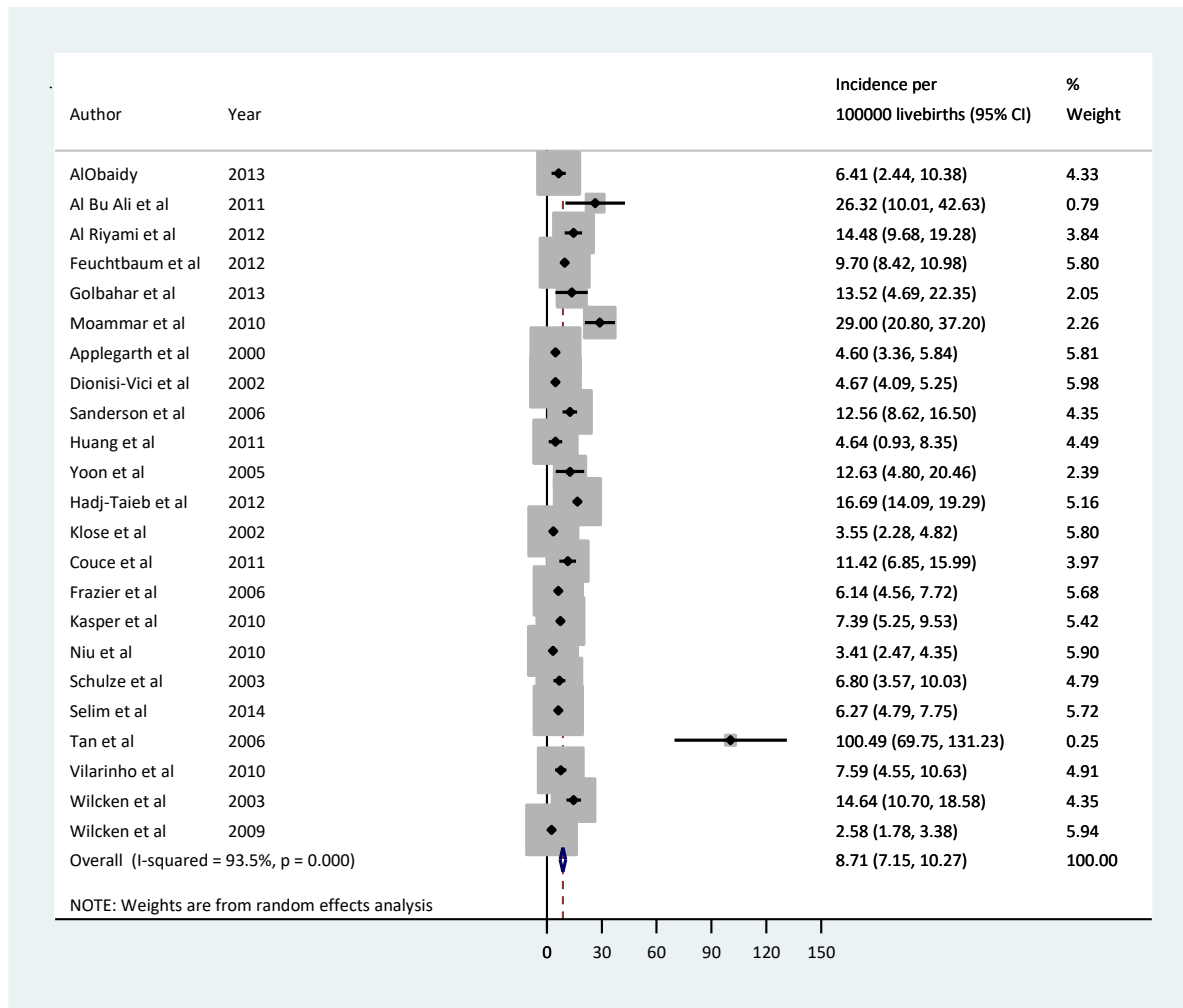

### A 3.6. Meta-estimate of incidence of propionic aciduria

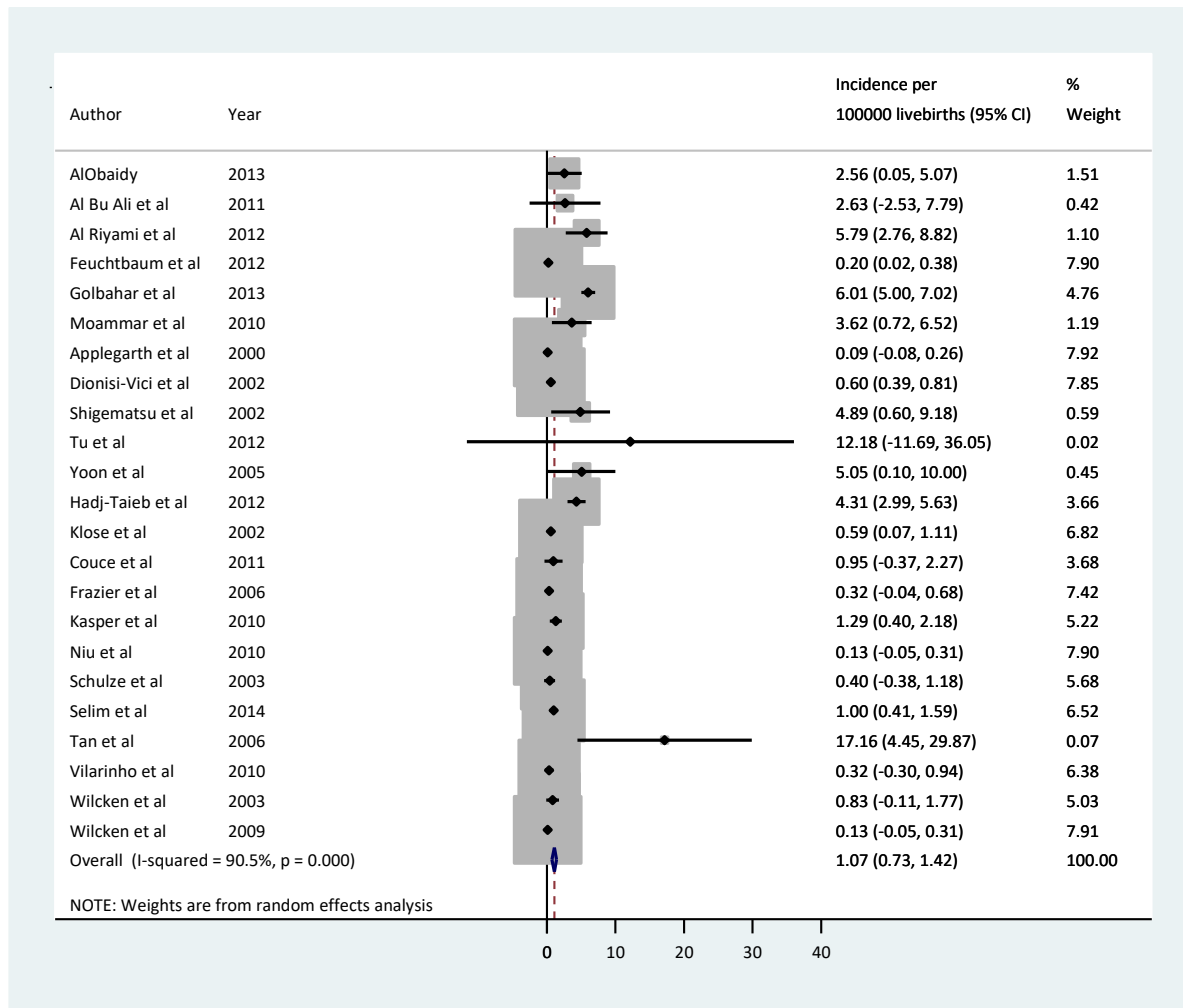

### A 3.7. Meta-estimate of incidence of methyl malonic aciduria

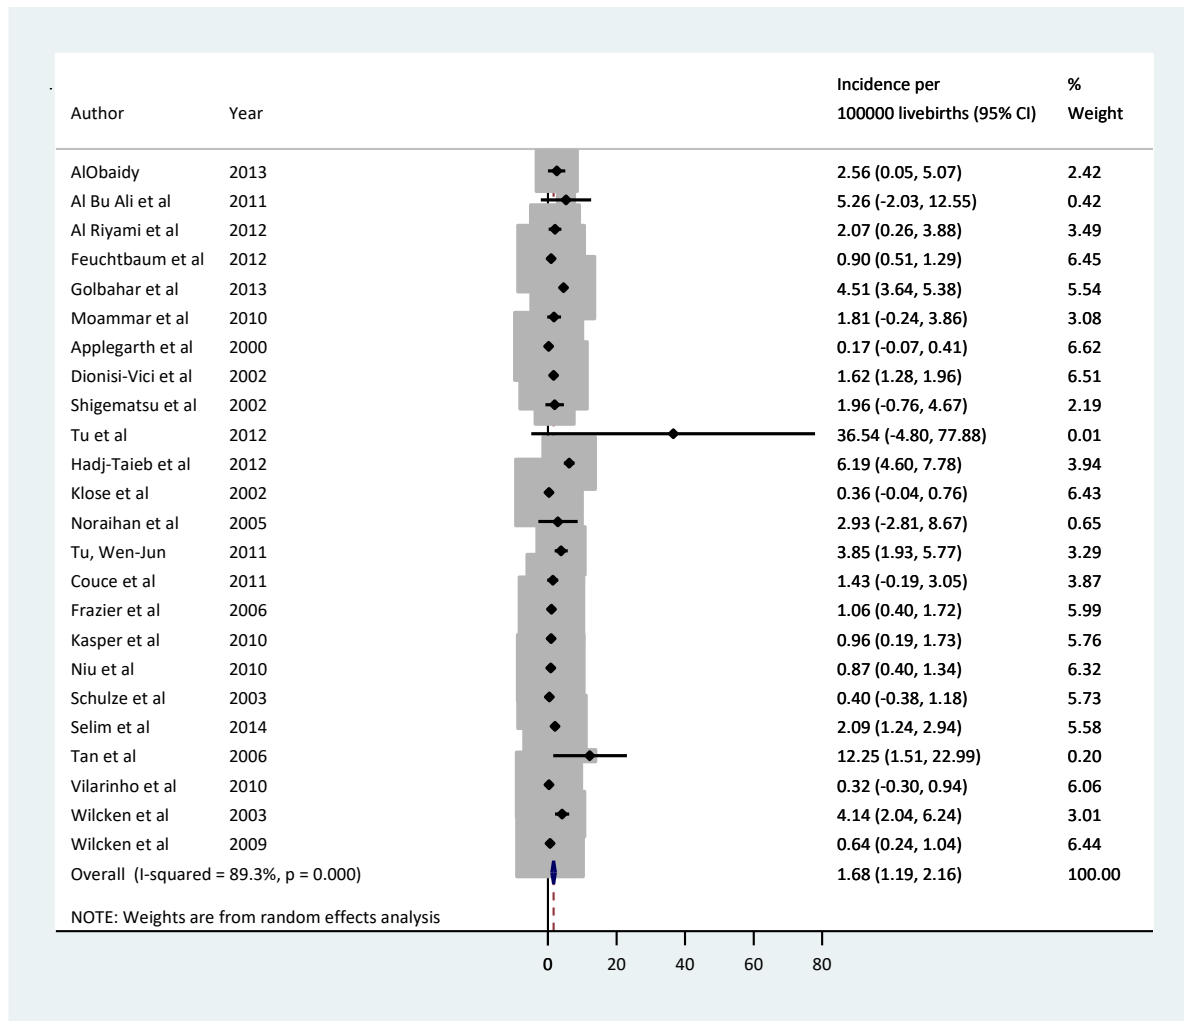

### A 3.8. Meta-estimate of incidence of isovaleric aciduria

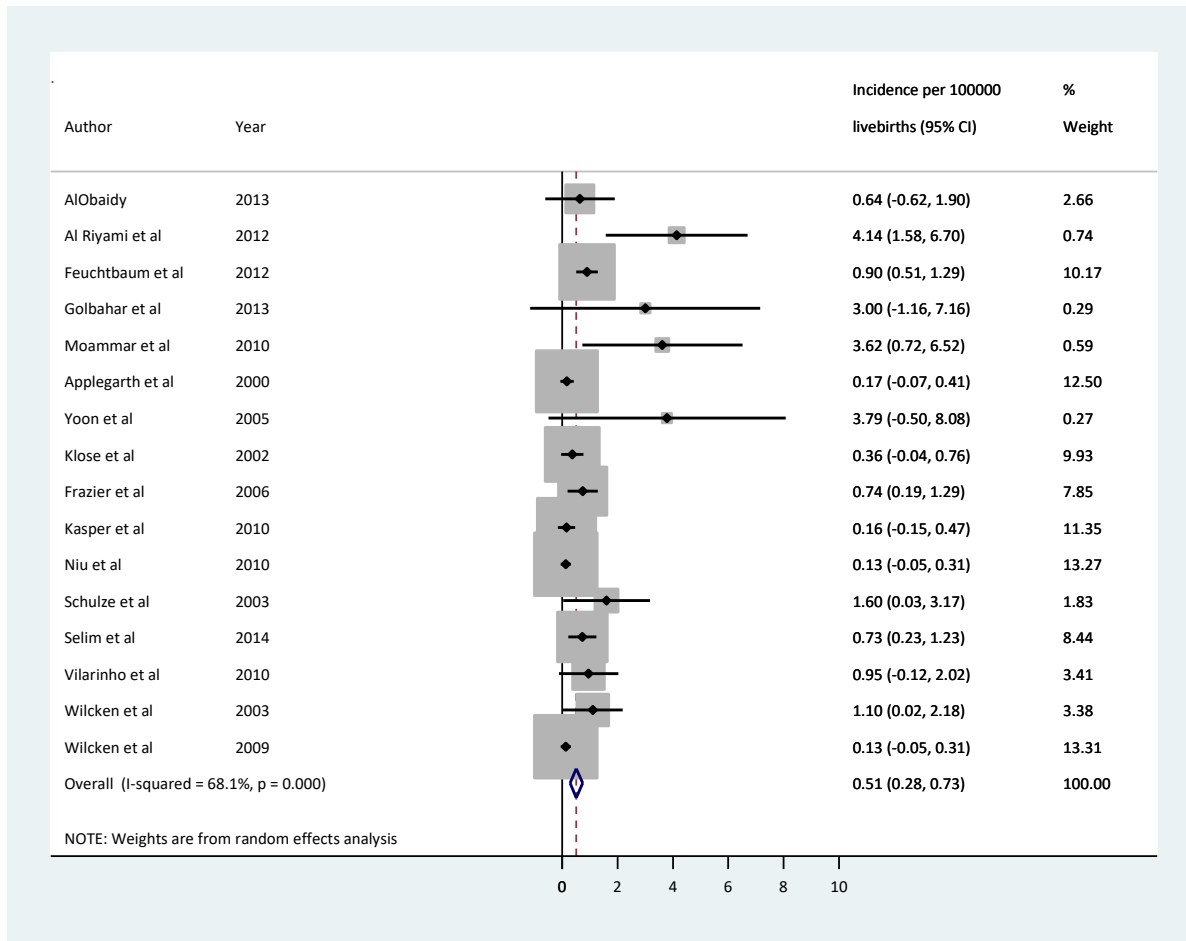

### A 3.9. Meta-estimate of incidence of biotinidase deficiency

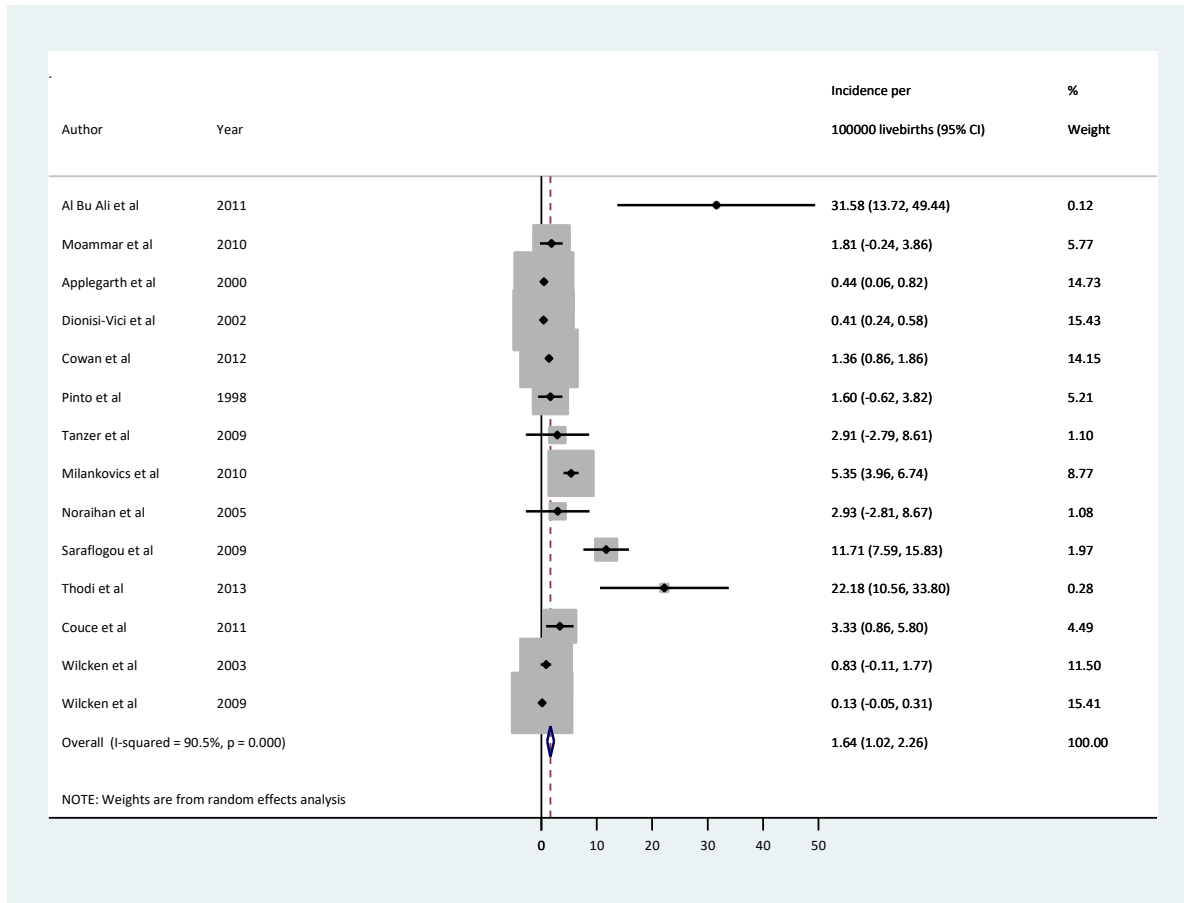

### A 3.10. Meta-estimate of incidence of all fatty acid disorders

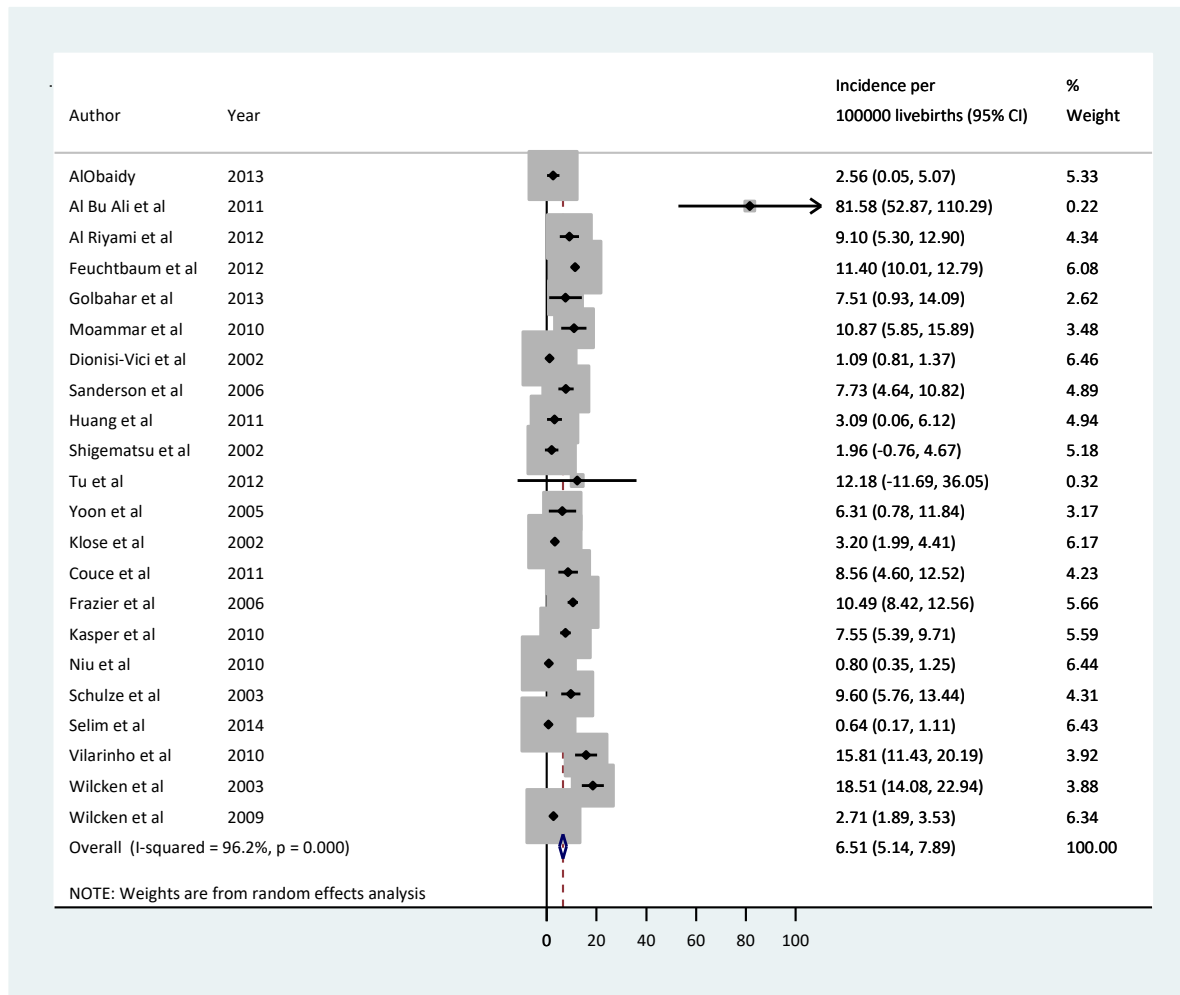

### A 3.11. Meta-estimate of incidence of medium chain acyl coenzyme A dehydrogenase (MCAD) deficiency

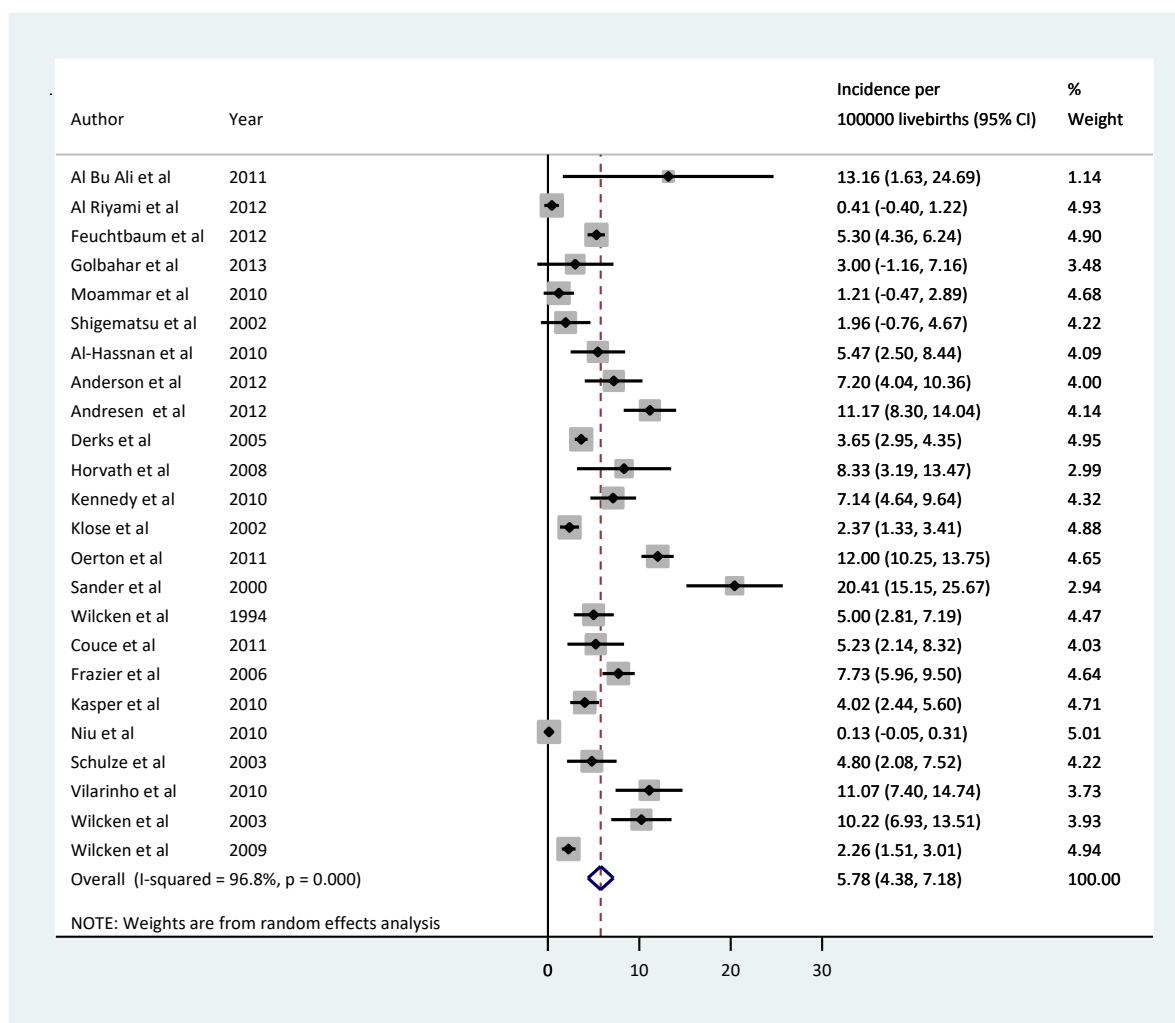

### A 3.12. Meta-estimate of incidence of all lysosomal storage disorders

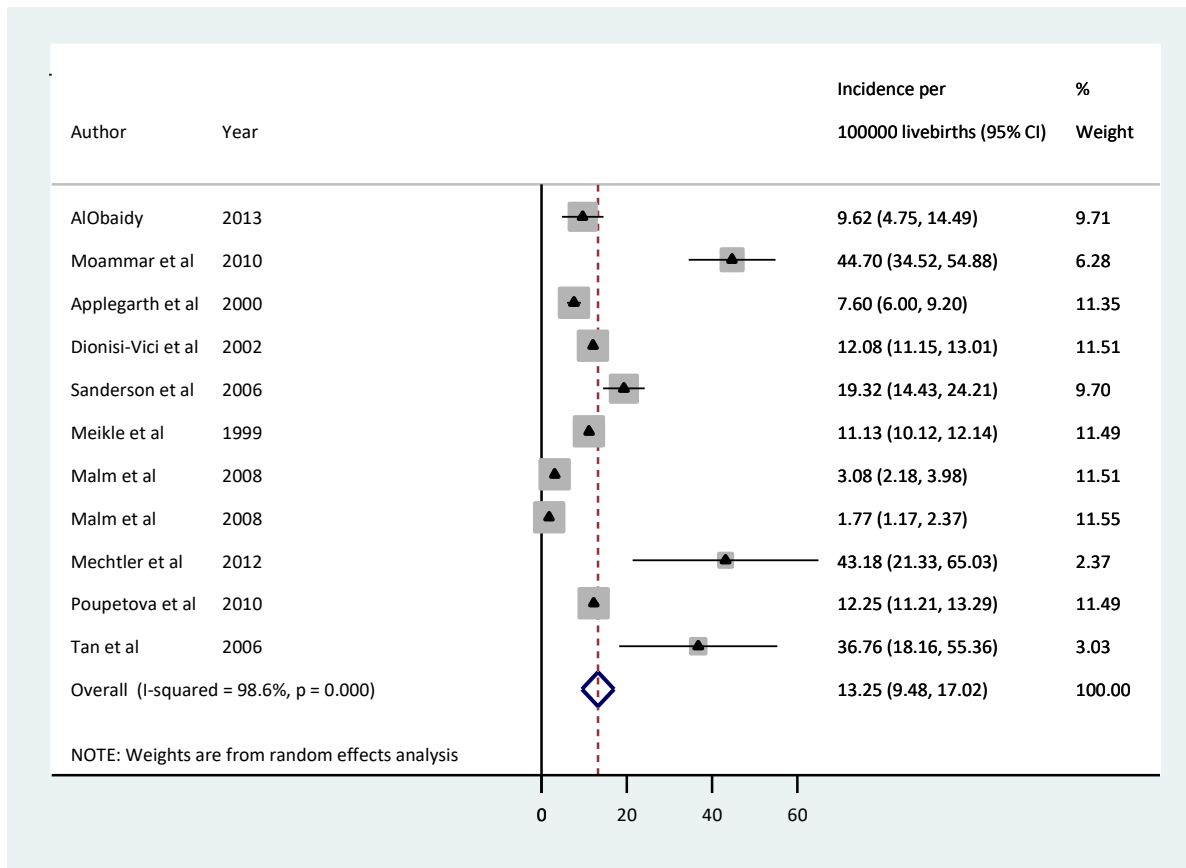



### A 3.13. Meta-estimate of incidence of all carbohydrate metabolism disorders

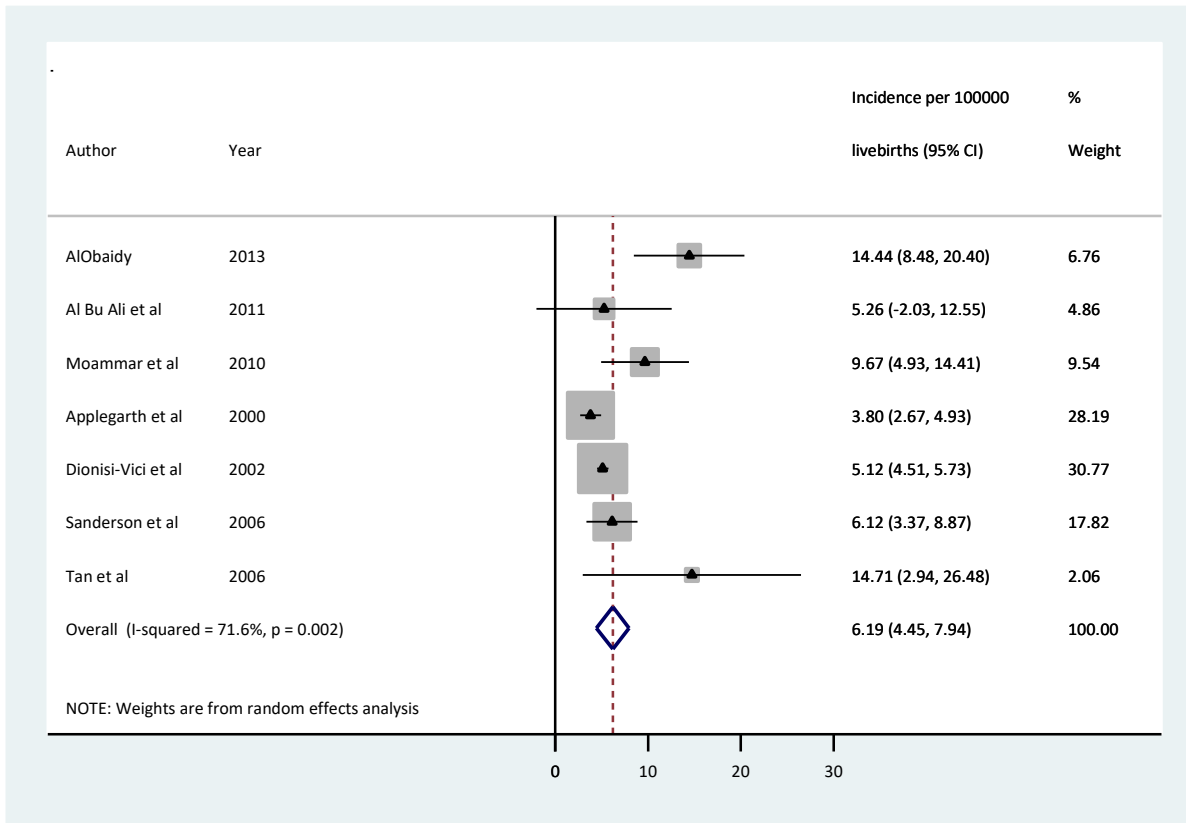

### A 3.14. Meta-estimate of incidence of all urea cycle disorders

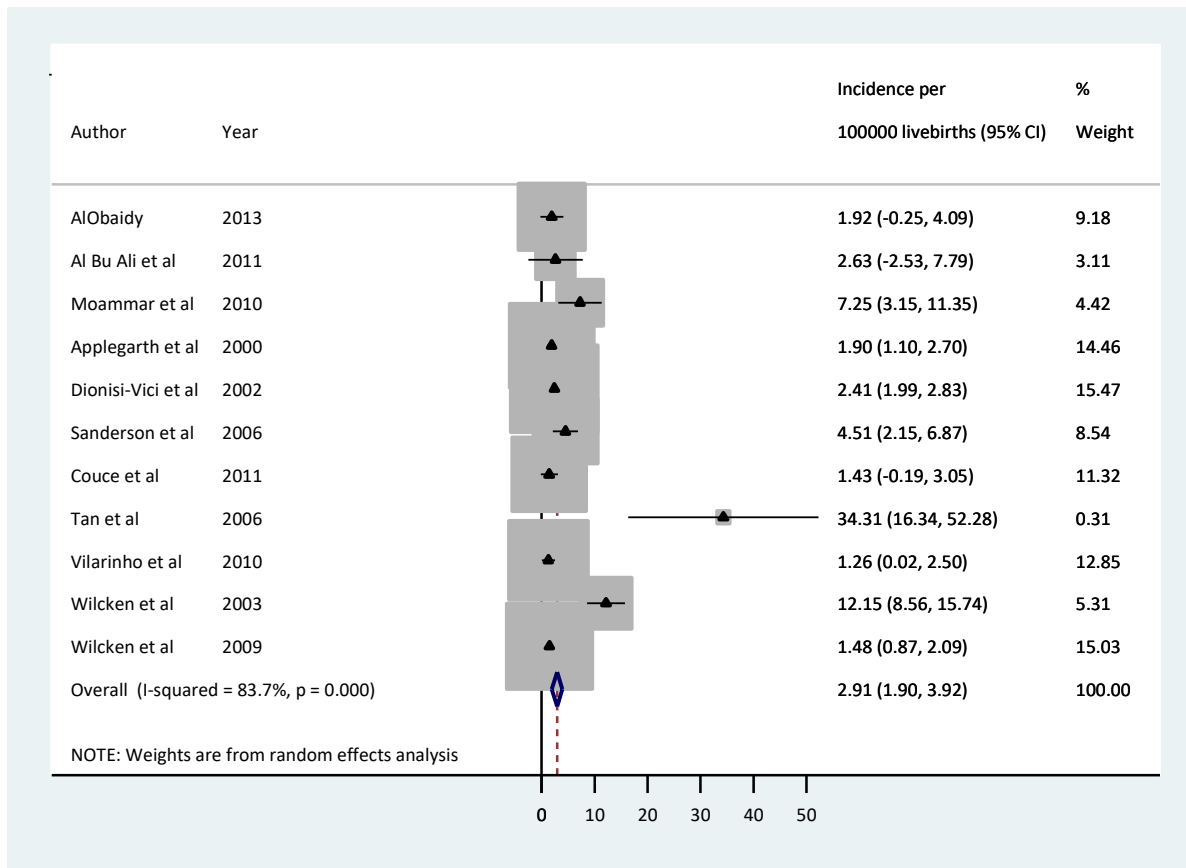

### A 3.15. Meta-estimate of incidence of all mitochondrial disorders

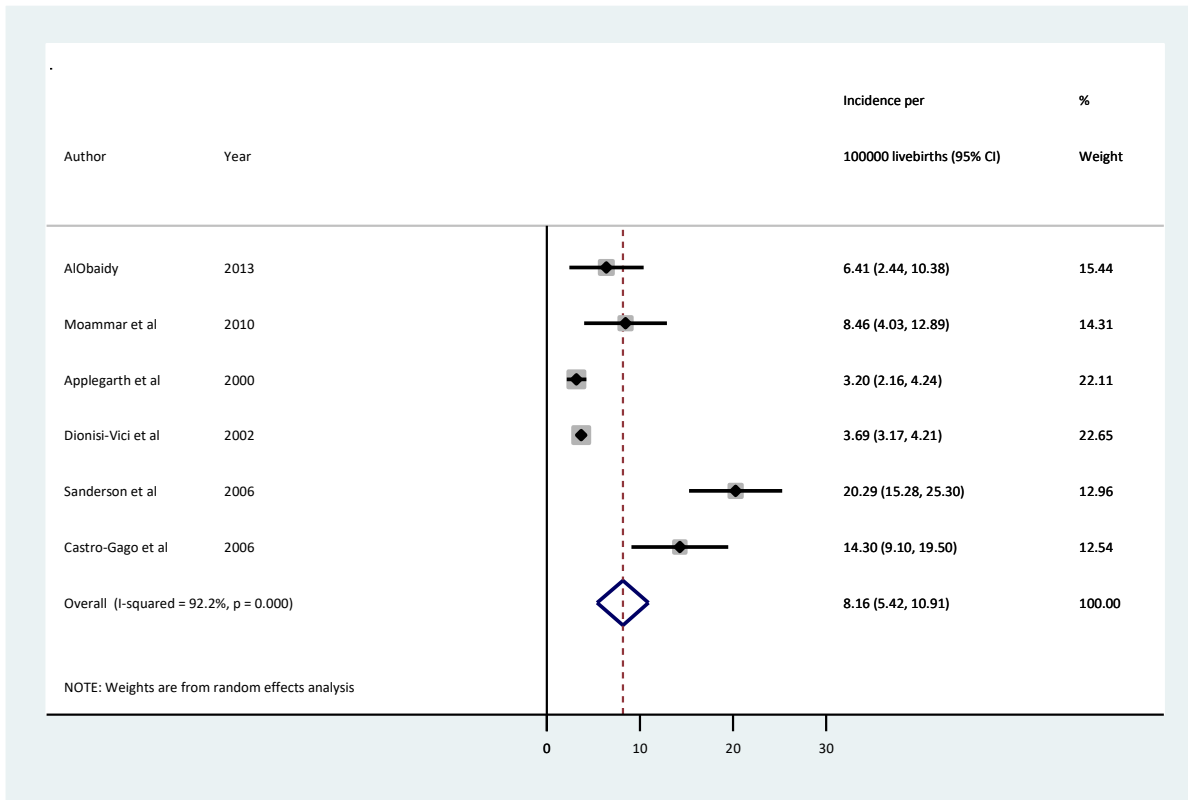

### A 3.16. Meta-estimate of incidence of all peroxisomal disorders

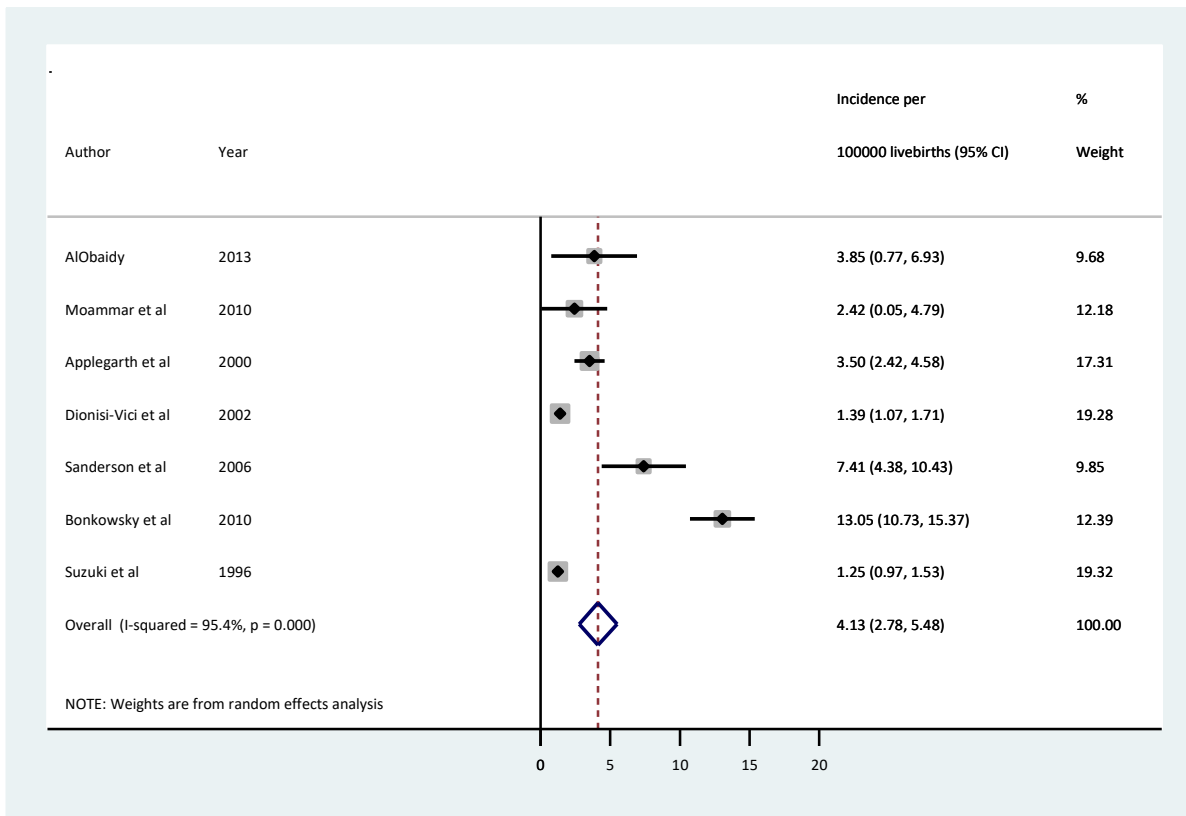



## Appendix 4: characteristics of studies included for analysis of specific IEM categories

### A 4.1. Studies reporting estimates for amino acid disorders

| Author               | Year | Location                               | Setting     | Period of study     | Total live births | Cases in cohort | Birth prevalence /100000 LB | Deaths in birth cohort |
|----------------------|------|----------------------------------------|-------------|---------------------|-------------------|-----------------|-----------------------------|------------------------|
| Al Bu Ali et al[1]   | 2011 | Saudi Arabia, Al Ahsa                  | Urban-Rural | Apr 2006 - Apr 2009 | 38001             | 1               | 2.63                        | 9                      |
| Huang et al[2]       | 2012 | China, Zhejiang Province               | Urban-Rural | Jan 2008 - Jan 2011 |                   | 11              |                             |                        |
| Al Riyami et al[3]   | 2012 | Oman, Al Khoudh                        | Urban-Rural | May 1998 - Jul 2008 | 241757            | 8               | 3.31                        |                        |
| Feuchtbaum et al[4]  | 2012 | USA, California                        | Urban       | Jul 2005 - Jul 2010 | 2282138           | 66              | 2.9                         |                        |
| Golbahar et al[5]    | 2013 | Bahrain                                | Urban-Rural | Jan 2008 - Dec 2011 | 66565             | 3               | 4.51                        |                        |
| Moammar et al[6]     | 2010 | Saudi Arabia, Dhahran Eastern Province | Urban-Rural | Jan 1983 - Jan 2008 | 165530            | 12              | 7.25                        |                        |
| Applegarth et al[7]  | 2000 | Canada, British Columbia               | Urban       | Jan 1969- Jan 1996  | 1142912           | 86              | 7.10                        |                        |
| Sanderson et al[8]   | 2006 | UK, West Midlands                      | Urban       | Jan 1999 - Dec 2003 | 310510            | 25              | 8.05153                     |                        |
| Nagaraja et al[9]    | 2010 | India, Southern states                 | Urban-Rural | Jan 2007 - Dec 2009 |                   | 19              |                             |                        |
| Shigematsu et al[10] | 2002 | Japan, Fukui                           | Urban-Rural | Apr 1997 - Jul 2001 | 102200            | 1               | 0.978474                    | 137                    |
| Yoon et al[11]       | 2005 | South Korea, Seoul                     | Urban       | Apr 2001 - Mar 2004 | 79179             | 4               | 5.05                        |                        |
| Abadie et al[12]     | 2001 | France, National                       | Urban-Rural | 1980-1997           | 21500000          | 1426            | 5.84                        | 5                      |
| Boneh et al[13]      | 2006 | Australia, Victoria                    | Urban       | Nov 2001- Oct 2004  | 190835            | 17              | 8.9                         |                        |
| Jiang et al[14]      | 2003 | China, Guangdong                       | Urban-Rural | 2001-2002           | 461805            | 14              | 1.3                         |                        |
| Lugovska et al[15]   | 1999 | Latvia                                 | Urban-Rural | 1980-1998           | 38684             | 51              | 11.49                       |                        |
| Oddason et al[16]    | 2011 | Iceland, National                      | Urban-Rural | 1972-2008           | 226891            | 27              | 11.9                        |                        |
| Chen et al[17]       | 1989 | China, Shanghai                        | Urban       | Oct 1981- Dec 1988  | 358767            | 21              | 5.88                        | 3                      |
| Schuler et al[18]    | 1996 | Hungary, Budapest                      | Urban       | Jan 1975 - Dec 1994 | 1500000           | 160             | 11.11                       |                        |
| Zhao et al[19]       | 2005 | China, Zhejiang province               | Urban-Rural | Jan 2002- Jan 2003  | 726998            | 32              | 4.40                        |                        |
| Hardelid et al[20]   | 2008 | England, South East                    | Urban       | Jan 1994-Dec 2004   | 1576419           | 167             | 10.59                       |                        |
| Sander et al[21]     | 2001 | Germany                                | Urban       | Jul 1989 - Dec 1999 | 283408            | 28              | 10                          |                        |
| Zhan et al[22]       | 2009 | China, Hangzhou                        | Urban-Rural | Jan 1985 - Dec 2007 | 19000000          | 1638            | 8.64                        | 2                      |
| Couce et al[23]      | 2011 | Spain, Galicia                         | Urban       | Jul 2000 - Jul 2010 | 210165            | 17              | 8.09                        |                        |
| Frazier et al[24]    | 2006 | USA, North Carolina                    | Urban       | Jul 1997- Jul 2005  | 944078            | 49              | 5.19                        |                        |

|                     |      |                    |             |                     |         |     |       |   |
|---------------------|------|--------------------|-------------|---------------------|---------|-----|-------|---|
| Kasper et al[25]    | 2010 | Austria, National  | Urban-Rural | Apr 2002 - Dec 2009 | 622489  | 50  | 8.03  | 1 |
| Niu et al[26]       | 2010 | Taiwan             | Urban-Rural | Mar 2000 - Jun 2009 | 1495132 | 25  | 1.67  |   |
| Schulze et al[27]   | 2003 | Germany            | Urban-Rural | Apr 1998 - Sep 2001 | 250000  | 24  | 9.60  |   |
| Selim et al[28]     | 2014 | Egypt              | Urban-Rural | Jun 2008 - Jun 2013 | 1100000 | 100 | 9.09  |   |
| Tan et al[29]       | 2006 | Singapore          | Urban       | Jan 1992 -Jan 2005  | 40800   | 6   | 14.71 |   |
| Vilarinho et al[30] | 2010 | Portugal, national | Urban-Rural | Jan 2005 - Jan 2009 | 316243  | 26  | 8.22  |   |

#### A 4.2. Studies reporting estimates for organic acid disorders

| Author                 | Year | Location                               | Setting     | Period of study       | Total live births | Cases in cohort | Birth prevalence /100000 LB | Deaths in birth cohort |
|------------------------|------|----------------------------------------|-------------|-----------------------|-------------------|-----------------|-----------------------------|------------------------|
| AlObaidy[31]           | 2013 | Libya, Tripoli                         | Urban       | Jan 2001 - Dec 2012   | 156006            | 10              | 6.41                        | 1                      |
| Al Bu Ali et al[1]     | 2011 | Saudi Arabia, Al Ahsa                  | Urban-Rural | Apr 2006 - Apr 2009   | 38001             | 10              | 26.32                       |                        |
| Huang et al[2]         | 2012 | China, Zhejiang Province               | Urban-Rural | Jan 2008 - Jan 2011   |                   | 26              |                             | 5                      |
| Al Riyami et al[3]     | 2012 | Oman, Al Khoudh                        | Urban-Rural | May 1998 - Jul 2008   | 241757            | 35              | 14.48                       |                        |
| Feuchtbaum et al[4]    | 2012 | USA, California                        | Urban       | Jul 2005 - Jul 2010   | 2282138           | 221             | 9.7                         |                        |
| Golbahar et al[5]      | 2013 | Bahrain                                | Urban-Rural | Jan 2008 - Dec 2011   | 66565             | 9               | 13.52                       |                        |
| Kamate et al[32]       | 2010 | India, Karnataka                       | Urban-Rural | Aug 2007 - Sept 2008  |                   | 4               |                             | 2                      |
| Moammar et al[6]       | 2010 | Saudi Arabia, Dhahran Eastern Province | Urban-Rural | Jan 1983 - Jan 2008   | 165530            | 48              | 29.00                       |                        |
| Applegarth et al[7]    | 2000 | Canada, British Columbia               | Urban       | Jan 1969- Jan 1996    | 1142912           | 36              | 4.60                        |                        |
| Dionisi-Vici et al[33] | 2002 | Italy, national survey                 | Urban-Rural | Jan 1985 - Dec 1997   | 5336730           | 249             | 4.67                        | 58                     |
| Sanderson et al[8]     | 2006 | UK, West Midlands                      | Urban       | Jan 1999 - Dec 2003   | 310510            | 39              | 12.55966                    |                        |
| Nagaraja et al[9]      | 2010 | India, Southern states                 | Urban-Rural | Jan 2007 - Dec 2009   |                   | 47              |                             |                        |
| Han et al[34]          | 2007 | China, Shanghai                        | Urban       | Jan 2002 - Oct 2006   |                   | 107             |                             |                        |
| Huang et al[35]        | 2011 | China, Zhejiang province               | Urban-Rural | Jan 2008 - Jan 2011   | 129415            | 6               | 4.64                        |                        |
| Yoon et al[11]         | 2005 | South Korea, Seoul                     | Urban       | Apr 2001 - Mar 2004   | 79179             | 10              | 12.63                       |                        |
| Hadj-Taieb et al[36]   | 2012 | Tunisia, Tunis                         | Urban       | Jan 1987- Dec 2009    | 946404            | 158             | 16.69                       |                        |
| Klose et al[37]        | 2002 | Germany                                | Urban-Rural | Jan 1999- Dec 2000    | 844575            | 30              | 3.55                        | 3                      |
| Couce et al[23]        | 2011 | Spain, Galicia                         | Urban       | Jul 2000 - Jul 2010   | 210165            | 24              | 11.42                       | 3                      |
| Frazier et al[24]      | 2006 | USA, North Carolina                    | Urban       | Jul 1997- Jul 2005    | 944078            | 58              | 6.14                        | 3                      |
| Kasper et al[25]       | 2010 | Austria, National                      | Urban-Rural | Apr 2002 - Dec 2009   | 622489            | 46              | 7.39                        |                        |
| Niu et al[26]          | 2010 | Taiwan                                 | Urban-Rural | Mar 2000 - Jun 2009   | 1495132           | 51              | 3.41                        |                        |
| Schulze et al[27]      | 2003 | Germany                                | Urban-Rural | Apr 1998 - Sep 2001   | 250000            | 17              | 6.80                        |                        |
| Selim et al[28]        | 2014 | Egypt                                  | Urban-Rural | Jun 2008 - Jun 2013   | 1100000           | 69              | 6.27                        |                        |
| Tan et al[29]          | 2006 | Singapore                              | Urban       | Jan 1992 -Jan 2005    | 40800             | 41              | 100.49                      |                        |
| Vilarinho et al[30]    | 2010 | Portugal, national                     | Urban-Rural | Jan 2005 - Jan 2009   | 316243            | 24              | 7.59                        |                        |
| Wilcken et al[38]      | 2003 | Australia, New South Wales / Sydney    | Urban       | April 1998 - Mar 2002 | 362000            | 53              | 14.64                       |                        |



|                   |      |                     |             |                    |         |    |      |  |
|-------------------|------|---------------------|-------------|--------------------|---------|----|------|--|
| Wilcken et al[39] | 2009 | Australia, national | Urban-Rural | Jan 1994 - Jan2002 | 1551200 | 40 | 2.58 |  |
|-------------------|------|---------------------|-------------|--------------------|---------|----|------|--|

#### A 4.3. Studies reporting estimates for fatty acid disorders

| Author                 | Year | Location                               | Setting     | Period of study       | Total live births | Cases in cohort | Birth prevalence /100000 LB | Deaths in birth cohort |
|------------------------|------|----------------------------------------|-------------|-----------------------|-------------------|-----------------|-----------------------------|------------------------|
| AlObaidy[31]           | 2013 | Libya, Tripoli                         | Urban       | Jan 2001 - Dec 2012   | 156006            | 4               | 2.56                        | 3                      |
| Al Bu Ali et al[1]     | 2011 | Saudi Arabia, Al Ahsa                  | Urban-Rural | Apr 2006 - Apr 2009   | 38001             | 31              | 81.58                       |                        |
| Huang et al[2]         | 2012 | China, Zhejiang Province               | Urban-Rural | Jan 2008 - Jan 2011   |                   | 9               |                             |                        |
| Al Riyami et al[3]     | 2012 | Oman, Al Khoudh                        | Urban-Rural | May 1998 - Jul 2008   | 241757            | 22              | 9.10                        |                        |
| Feuchtbaum et al[4]    | 2012 | USA, California                        | Urban       | Jul 2005 - Jul 2010   | 2282138           | 260             | 11.4                        |                        |
| Golbahar et al[5]      | 2013 | Bahrain                                | Urban-Rural | Jan 2008 - Dec 2011   | 66565             | 5               | 7.51                        |                        |
| Kamate et al[32]       | 2010 | India, Karnataka                       | Urban-Rural | Aug 2007 - Sept 2008  |                   | 6               |                             | 2                      |
| Moammar et al[6]       | 2010 | Saudi Arabia, Dhahran Eastern Province | Urban-Rural | Jan 1983 - Jan 2008   | 165530            | 18              | 10.87                       |                        |
| Dionisi-Vici et al[33] | 2002 | Italy, national survey                 | Urban-Rural | Jan 1985 - Dec 1997   | 5336730           | 58              | 1.09                        |                        |
| Sanderson et al[8]     | 2006 | UK, West Midlands                      | Urban       | Jan 1999 - Dec 2003   | 310510            | 24              | 7.72917                     |                        |
| Nagaraja et al[9]      | 2010 | India, Southern states                 | Urban-Rural | Jan 2007 - Dec 2009   |                   | 5               |                             |                        |
| Han et al[34]          | 2007 | China, Shanghai                        | Urban       | Jan 2002 - Oct 2006   |                   | 13              |                             |                        |
| Huang et al[35]        | 2011 | China, Zhejiang province               | Urban-Rural | Jan 2008 - Jan 2011   | 129415            | 4               | 3.09                        |                        |
| Shigematsu et al[10]   | 2002 | Japan, Fukui                           | Urban-Rural | Apr 1997 - Jul 2001   | 102200            | 2               | 1.956947                    |                        |
| Tu et al [40]          | 2012 | China, Beijing                         | Urban       | Jan - Dec 2009        | 8211              | 1               | 12.18                       |                        |
| Yoon et al[11]         | 2005 | South Korea, Seoul                     | Urban       | Apr 2001 - Mar 2004   | 79179             | 5               | 6.31                        |                        |
| Klose et al[37]        | 2002 | Germany                                | Urban-Rural | Jan 1999- Dec 2000    | 844575            | 27              | 3.20                        | 5                      |
| Couce et al[23]        | 2011 | Spain, Galicia                         | Urban       | Jul 2000 - Jul 2010   | 210165            | 18              | 8.56                        | 1                      |
| Frazier et al[24]      | 2006 | USA, North Carolina                    | Urban       | Jul 1997- Jul 2005    | 944078            | 99              | 10.49                       | 2                      |
| Kasper et al[25]       | 2010 | Austria, National                      | Urban-Rural | Apr 2002 - Dec 2009   | 622489            | 47              | 7.55                        |                        |
| Niu et al[26]          | 2010 | Taiwan                                 | Urban-Rural | Mar 2000 - Jun 2009   | 1495132           | 12              | 0.80                        |                        |
| Schulze et al[27]      | 2003 | Germany                                | Urban-Rural | Apr 1998 - Sep 2001   | 250000            | 24              | 9.60                        | 2                      |
| Selim et al[28]        | 2014 | Egypt                                  | Urban-Rural | Jun 2008 - Jun 2013   | 1100000           | 7               | 0.64                        |                        |
| Vilarinho et al[30]    | 2010 | Portugal, national                     | Urban-Rural | Jan 2005 - Jan 2009   | 316243            | 50              | 15.81                       |                        |
| Wilcken et al[38]      | 2003 | Australia, New South Wales / Sydney    | Urban       | April 1998 - Mar 2002 | 362000            | 67              | 18.51                       |                        |
| Wilcken et al[39]      | 2009 | Australia, national                    | Urban-Rural | Jan 1994 - Jan2002    | 1551200           | 42              | 2.71                        | 6                      |

#### A 4.4. Studies reporting estimates for lysosomal disorders

| Author                 | Year | Location                               | Setting       | Period of study     | Total live births | Cases in cohort | Birth prevalence /100000 LB | Deaths in birth cohort |
|------------------------|------|----------------------------------------|---------------|---------------------|-------------------|-----------------|-----------------------------|------------------------|
| AlObaidy[31]           | 2013 | Libya, Tripoli                         | Urban         | Jan 2001 - Dec 2012 | 156006            | 15              | 9.62                        | 8                      |
| Goel et al[41]         | 2010 | Australia, Victoria                    | Urban         | Jan 1997 - Jan 2007 |                   |                 |                             | 21                     |
| Moammar et al[6]       | 2010 | Saudi Arabia, Dhahran Eastern Province | Urban-Rural   | Jan 1983 - Jan 2008 | 165530            | 74              | 44.70                       |                        |
| Applegarth et al[7]    | 2000 | Canada, British Columbia               | Urban         | Jan 1969- Jan 1996  | 1142912           | 70              | 7.60                        |                        |
| Dionisi-Vici et al[33] | 2002 | Italy, national survey                 | Urban-Rural   | Jan 1985 - Dec 1997 | 5336730           | 645             | 12.08                       |                        |
| Sanderson et al[8]     | 2006 | UK, West Midlands                      | Urban         | Jan 1999 - Dec 2003 | 310510            | 60              | 19.32367                    |                        |
| Meikle et al[42]       | 1999 | Australia, national                    | Urban         | Jan 1980 - Dec 1996 | 4222323           | 470             | 11.13                       |                        |
| Malm et al[43]         | 2008 | Norway                                 | Urban - Rural | 1975-2004           | 1461039           | 45              | 3.08                        |                        |
| Malm et al[43]         | 2008 | Denmark                                | Urban - Rural | 1975-2004           | 1864407           | 33              | 1.77                        |                        |
| Mechtler et al[44]     | 2012 | Austria                                | Urban - Rural | Jan-Dec 2010        | 34736             | 15              | 43.18                       |                        |
| Poupetova et al[45]    | 2010 | Czech Rep                              | Urban         | 1975-2008           | 4326531           | 530             | 12.25                       |                        |
| Tan et al[29]          | 2006 | Singapore                              | Urban         | Jan 1992 -Jan 2005  | 40800             | 15              | 36.76                       |                        |

#### A 4.4. Studies reporting estimates for carbohydrate metabolism disorders

| Author                 | Year | Location                               | Setting     | Period of study     | Total live births | Cases in cohort | Birth prevalence /100000 LB | Deaths in birth cohort |
|------------------------|------|----------------------------------------|-------------|---------------------|-------------------|-----------------|-----------------------------|------------------------|
| AlObaidy[31]           | 2013 | Libya, Tripoli                         | Urban       | Jan 2001 - Dec 2012 | 156006            | 16              | 14.44                       | 4                      |
| Al Bu Ali et al[1]     | 2011 | Saudi Arabia, Al Ahsa                  | Urban-Rural | Apr 2006 - Apr 2009 | 38001             | 2               | 5.26                        |                        |
| Moammar et al[6]       | 2010 | Saudi Arabia, Dhahran Eastern Province | Urban-Rural | Jan 1983 - Jan 2008 | 165530            | 16              | 9.67                        |                        |
| Applegarth et al[7]    | 2000 | Canada, British Columbia               | Urban       | Jan 1969- Jan 1996  | 1142912           | 40              | 3.80                        |                        |
| Dionisi-Vici et al[33] | 2002 | Italy, national survey                 | Urban-Rural | Jan 1985 - Dec 1997 | 5336730           | 273             | 5.12                        | 2                      |
| Sanderson et al[8]     | 2006 | UK, West Midlands                      | Urban       | Jan 1999 - Dec 2003 | 310510            | 19              | 6.118828                    |                        |
| Tan et al[29]          | 2006 | Singapore                              | Urban       | Jan 1992 -Jan 2005  | 40800             | 6               | 14.71                       |                        |

#### A 4.5. Studies reporting estimates for urea cycle disorders

| Author                     | Year | Location                               | Setting     | Period of study       | Total live births | Cases in cohort | incidence/100000 livebirths | Deaths in birth cohort |
|----------------------------|------|----------------------------------------|-------------|-----------------------|-------------------|-----------------|-----------------------------|------------------------|
| AIObaidy[31]               | 2013 | Libya, Tripoli                         | Urban       | Jan 2001 - Dec 2012   | 156006            | 3               | 1.92                        |                        |
| Al Bu Ali et al[1]         | 2011 | Saudi Arabia, Al Ahsa                  | Urban-Rural | Apr 2006 - Apr 2009   | 38001             | 1               | 2.63                        |                        |
| Moammar et al[6]           | 2010 | Saudi Arabia, Dhahran Eastern Province | Urban-Rural | Jan 1983 - Jan 2008   | 165530            | 12              | 7.25                        |                        |
| Applegarth et al[7]        | 2000 | Canada, British Columbia               | Urban       | Jan 1969- Jan 1996    | 1142912           | 18              | 1.90                        |                        |
| Dionisi-Vici et al[33]     | 2002 | Italy, national survey                 | Urban-Rural | Jan 1985 - Dec 1997   | 5336730           | 129             | 2.41                        |                        |
| Sanderson et al[8]         | 2006 | UK, West Midlands                      | Urban       | Jan 1999 - Dec 2003   | 310510            | 14              | 4.51                        |                        |
| Ibarra- Gonzalez et al[46] | 2014 | Mexico, Mexico city                    | Urban       | Jan 2007 - Dec 2012   |                   | 2               |                             | 2                      |
| Couce et al[23]            | 2011 | Spain, Galicia                         | Urban       | Jul 2000 - Jul 2010   | 210165            | 3               | 1.43                        |                        |
| Tan et al[29]              | 2006 | Singapore                              | Urban       | Jan 1992 -Jan 2005    | 40800             | 14              | 34.31                       |                        |
| Vilarinho et al[30]        | 2010 | Portugal, national                     | Urban-Rural | Jan 2005 - Jan 2009   | 316243            | 4               | 1.26                        |                        |
| Wilcken et al[38]          | 2003 | Australia, New South Wales / Sydney    | Urban       | April 1998 - Mar 2002 | 362000            | 44              | 12.15                       |                        |
| Wilcken et al[39]          | 2009 | Australia, national                    | Urban-Rural | Jan 1994 - Jan2002    | 1551200           | 23              | 1.48                        |                        |

#### A 4.6. Studies reporting estimates for mitochondrial disorders

| Author                 | Year | Location                               | Setting     | Period of study     | Total live births | Cases in cohort | Birth prevalence /100000 LB | Deaths in birth cohort |
|------------------------|------|----------------------------------------|-------------|---------------------|-------------------|-----------------|-----------------------------|------------------------|
| AIObaidy[31]           | 2013 | Libya, Tripoli                         | Urban       | Jan 2001 - Dec 2012 | 156006            | 10              | 6.41                        | 6                      |
| Goel et al[41]         | 2010 | Australia, Victoria                    | Urban       | Jan 1997 - Jan 2007 |                   |                 |                             | 29                     |
| Moammar et al[6]       | 2010 | Saudi Arabia, Dhahran Eastern Province | Urban-Rural | Jan 1983 - Jan 2008 | 165530            | 14              | 8.46                        |                        |
| Applegarth et al[7]    | 2000 | Canada, British Columbia               | Urban       | Jan 1969- Jan 1996  | 1142912           | 13              | 3.20                        |                        |
| Dionisi-Vici et al[33] | 2002 | Italy, national survey                 | Urban-Rural | Jan 1985 - Dec 1997 | 5336730           | 197             | 3.69                        | 76                     |
| Sanderson et al[8]     | 2006 | UK, West Midlands                      | Urban       | Jan 1999 - Dec 2003 | 310510            | 63              | 20.28809                    |                        |
| Castro-Gago et al[47]  | 2006 | Spain, North West                      | Urban-Rural | Jan 1990- Dec 1999  | 203054            | 29              | 14.3                        | 16                     |

#### A 4.7. Studies reporting estimates for peroxisomal disorders

| Author                 | Year | Location                               | Setting     | Period of study     | Total live births | Cases in cohort | Birth prevalence /100000 LB | Deaths in birth cohort |
|------------------------|------|----------------------------------------|-------------|---------------------|-------------------|-----------------|-----------------------------|------------------------|
| AlObaidy[31]           | 2013 | Libya, Tripoli                         | Urban       | Jan 2001 - Dec 2012 | 156006            | 6               | 3.85                        | 3                      |
| Goel et al[41]         | 2010 | Australia, Victoria                    | Urban       | Jan 1997 - Jan 2007 |                   |                 |                             | 6                      |
| Moammar et al[6]       | 2010 | Saudi Arabia, Dhahran Eastern Province | Urban-Rural | Jan 1983 - Jan 2008 | 165530            | 4               | 2.42                        |                        |
| Applegarth et al[7]    | 2000 | Canada, British Columbia               | Urban       | Jan 1969- Jan 1996  | 1142912           | 20              | 3.50                        |                        |
| Dionisi-Vici et al[33] | 2002 | Italy, national survey                 | Urban-Rural | Jan 1985 - Dec 1997 | 5336730           | 74              | 1.39                        |                        |
| Sanderson et al[8]     | 2006 | UK, West Midlands                      | Urban       | Jan 1999 - Dec 2003 | 310510            | 23              | 7.407407                    |                        |
| Bonkowsky et al[48]    | 2010 | USA, Utah                              | Urban       | Jan 1999 - Dec 2007 | 934886            | 122             | 13.05                       | 42                     |
| Suzuki et al[49]       | 1996 | Japan                                  | Urban-Rural |                     | 6000000           | 75              | 1.25                        |                        |
| Tan et al[29]          | 2006 | Singapore                              | Urban       | Jan 1992 -Jan 2005  |                   | 3               | 7.35                        |                        |

## References (for all studies selected).

- [1] Al Bu Ali WH, Balaha MH, Al Moghannum MS, Hashim I. Risk factors and birth prevalence of birth defects and inborn errors of metabolism in Al Ahsa, Saudi Arabia. *Pan Afr Med J* 2011;8:14.
- [2] Huang X, Yang L, Tong F, Yang R, Zhao Z. Screening for inborn errors of metabolism in high-risk children: a 3-year pilot study in Zhejiang Province, China. *BMC Pediatr* 2012;12:18.
- [3] Al-Riyami S, Maney M Al, Joshi SN, Bayoumi R. Detection of Inborn Errors of Metabolism using Tandem Mass Spectrometry among High-risk Omani Patients. *Oman Med J* 2012;47:482–5.
- [4] Feuchtbaum L, Carter J, Dowray S, Currier RJ, Lorey F. Birth prevalence of disorders detectable through newborn screening by race/ethnicity. *Genet Med* 2012;14:937–45.
- [5] Golbahar J, Al-Jishi EA, Altayab DD, Carreon E, Bakhiet M, Alkhayyat H. Selective newborn screening of inborn errors of amino acids, organic acids and fatty acids metabolism in the Kingdom of Bahrain. *Mol Genet Metab* 2013;110:98–101.
- [6] Moammar H, Cheriyan G, Mathew R, Al-Sannaa N. Incidence and patterns of inborn errors of metabolism in the Eastern Province of Saudi Arabia, 1983-2008. *Ann Saudi Med* 2010;30:271. doi:10.4103/0256-4947.65254.
- [7] Applegarth DA, Toone JR, Lowry RB. Incidence of inborn errors of metabolism in British Columbia, 1969-1996. *Pediatrics* 2000;105:e10.
- [8] Sanderson S, Green A, Preece MA, Burton H. The incidence of inherited metabolic disorders in the West Midlands, UK. *Arch Dis Child* 2006;91:896–9.
- [9] Nagaraja D, Mamatha SN, De T, Christopher R. Screening for inborn errors of metabolism using automated electrospray tandem mass spectrometry: Study in high-risk Indian population. *Clin Biochem* 2010;43:581–8.
- [10] Shigematsu Y, Hirano S, Hata I, Tanaka Y, Sudo M, Sakura N, et al. Newborn mass screening and selective screening using electrospray tandem mass spectrometry in Japan. *J Chromatogr B Analyt Technol Biomed Life Sci* 2002;776:39–48.
- [11] Yoon H-R, Lee KR, Kang S, Lee DH, Yoo H-W, Min W-K, et al. Screening of newborns and high-risk group of children for inborn metabolic disorders using tandem mass spectrometry in South Korea: a three-year report. *Clin Chim Acta* 2005;354:167–80. doi:10.1016/j.cccn.2004.11.032.
- [12] Abadie V, Berthelot J, Feillet F, Maurin N, Mercier A, de Baulny HO, et al. Neonatal screening and long-term follow-up of phenylketonuria: the French database. *Early Hum Dev* 2001;65:149–58.
- [13] Boneh A, Francis DE, Humphrey M, Upton HJ, Peters HL. Three-year audit of the hyperphenylalaninaemia/phenylketonuria spectrum in Victoria. *J Paediatr Child Heal* 2006;42:496–8.
- [14] Jiang J, Ma X, Huang X, Pei X, Liu H, Tan Z, et al. A survey for the incidence of phenylketonuria in Guangdong, China. *Southeast Asian J Trop Med Public Heal* 2003;34 Suppl 3:185.
- [15] Lugovska R, Vevere P, Andrusaite R, Kornejeva A. Newborn screening for PKU and congenital hypothyroidism in Latvia. *Southeast Asian J*



Trop Med Public Heal 1999;30 Suppl 2:52–3.

- [16] Oddason KE, Eiriksdottir L, Franzson L, Dagbjartsson A. [Phenylketonuria (PKU) in Iceland]. *Laeknabladid* 2011;97:349–52.
- [17] Chen RG, Pan XS, Qian DL, Guo H. Twenty-one cases of phenylketonuria out of 358,767 newborns in Shanghai, China. *J Inherit Metab Dis* 1989;12:485.
- [18] Schuler A, Somogyi C, Toros I, Pataki L, Mete M, Kiss E, et al. A longitudinal study of phenylketonuria based on the data of the Budapest Screening Center. *Eur J Pediatr* 1996;155 Suppl 1:S50-2.
- [19] Zhao ZY, Qu YP, Qu LQ, Yu XL. [Screening for phenylketonuria in 726,998 neonates in Zhejiang Province]. *Zhejiang da Xue Xue Bao Yi Xue Ban/Journal Zhejiang Univ Med Sci* 2005;34:185–7.
- [20] Hardelid P, Cortina-Borja M, Munro A, Jones H, Cleary M, Champion MP, et al. The birth prevalence of PKU in populations of European, South Asian and sub-Saharan African ancestry living in South East England. *Ann Hum Genet* 2008;72:65–71. doi:<http://dx.doi.org/10.1111/j.1469-1809.2007.00389.x>.
- [21] Sander S, Janzen N, Janetzky B, Scholl S, Steuerwald U, Schafer J, et al. Neonatal screening for medium chain acyl-CoA deficiency: high incidence in Lower Saxony (northern Germany). *Eur J Pediatr* 2001;160:318–9.
- [22] Zhan JY, Qin YF, Zhao ZY. Neonatal screening for congenital hypothyroidism and phenylketonuria in China. *World J Pediatr* 2009;5:136–9. doi:<http://dx.doi.org/10.1007/s12519-009-0027-0>.
- [23] Couce ML, Bana A, Boveda MD, Perez-Munuzuri A, Fernandez-Lorenzo JR, Fraga JM. Inborn errors of metabolism in a neonatology unit: impact and long-term results. *Pediatr Int* 2011;53:13–7. doi:<http://dx.doi.org/10.1111/j.1442-200X.2010.03177.x>.
- [24] Frazier DM, Millington DS, McCandless SE, Koeberl DD, Weavil SD, Chaing SH, et al. The tandem mass spectrometry newborn screening experience in North Carolina: 1997–2005. *J Inherit Metab Dis* 2006;29:76–85.
- [25] Kasper DC, Ratschmann R, Metz TF, Mechtler TP, Möslinger D, Konstantopoulou V, et al. The National Austrian Newborn Screening Program – Eight years experience with mass spectrometry. Past, present, and future goals. *Wien Klin Wochenschr* 2010;122:607–13. doi:[10.1007/s00508-010-1457-3](http://dx.doi.org/10.1007/s00508-010-1457-3).
- [26] Niu DM, Chien YH, Chiang CC, Ho HC, Hwu WL, Kao SM, et al. Nationwide survey of extended newborn screening by tandem mass spectrometry in Taiwan. *J Inherit Metab Dis* 2010;33:S295-305. doi:<http://dx.doi.org/10.1007/s10545-010-9129-z>.
- [27] Schulze A, Lindner M, Kohlmüller D, Olgemöller K, Mayatepek E, Hoffmann GF. Expanded newborn screening for inborn errors of metabolism by electrospray ionization-tandem mass spectrometry: results, outcome, and implications. vol. 111. 2003. doi:[10.1007/bf01799385](http://dx.doi.org/10.1007/bf01799385).
- [28] Selim L a., Hassan SAH, Salem F, Orabi A, Hassan F a., El-Mougy F, et al. Selective screening for inborn errors of metabolism by tandem mass spectrometry in Egyptian children: A 5year report. *Clin Biochem* 2014;47:823–8. doi:[10.1016/j.clinbiochem.2014.04.002](http://dx.doi.org/10.1016/j.clinbiochem.2014.04.002).
- [29] Tan IK, Gajra B, Lim MS. Study of inherited metabolic disorders in Singapore - 13 years experience. *Ann Acad Med Singapore*

2006;35:804–13.

- [30] Vilarinho L, Rocha H, Sousa C, Marcao A, Fonseca H, Bogas M, et al. Four years of expanded newborn screening in Portugal with tandem mass spectrometry. *J Inher Metab Dis* 2010;33 Suppl 3:S133-8. doi:<http://dx.doi.org/10.1007/s10545-010-9048-z>.
- [31] AlObaidy H. Patterns of inborn errors of metabolism: A 12 year single-center hospital-based study in Libya. *Qatar Med J* 2013;18:1–9.
- [32] Kamate M, Chetal V, Kulgod V, Patil V, Christopher R. Profile of inborn errors of metabolism in a tertiary care centre PICU. *Indian J Pediatr* 2010;77:57–60. doi:10.1007/s12098-010-0008-2.
- [33] Dionisi-Vici C, Rizzo C, Burlina AB, Caruso U, Sabetta G, Uziel G, et al. Inborn errors of metabolism in the Italian pediatric population: a national retrospective survey. *J Pediatr* 2002;140:321–7.
- [34] Han LS, Ye J, Qiu WJ, Gao XL, Wang Y, Gu XF. Selective screening for inborn errors of metabolism on clinical patients using tandem mass spectrometry in China: A four-year report. *J Inher Metab Dis* 2007;30:507–14.
- [35] Huang X, Yang J, Tong F, Yang R, Mao H, Zhou X, et al. [Screening for neonatal inborn errors of metabolism by electrospray ionization-tandem mass spectrometry and follow-up]. *Zhonghua Er Ke Za Zhi = Chinese J Pediatr* 2011;49:765–70.
- [36] Hadj-Taieb S, Nasrallah F, Hammami MB, Elasmı M, Sanhaji H, Moncef F, et al. Aminoacidopathies and organic acidurias in Tunisia: a retrospective survey over 23 years. *Tunisie Medicale* 2012;90:258–61.
- [37] Klose DA, Kolker S, Heinrich B, Prietsch V, Mayatepek E, von Kries R, et al. Incidence and short-term outcome of children with symptomatic presentation of organic acid and fatty acid oxidation disorders in Germany. *Pediatrics* 2002;110:1204–11.
- [38] Wilcken B, Wiley V, Hammond J, Carpenter K. Screening newborns for inborn errors of metabolism by tandem mass spectrometry. *N Engl J Med* 2003;348:2304–12.
- [39] Wilcken B, Haas M, Joy P, Wiley V, Bowling F, Carpenter K, et al. Expanded newborn screening: outcome in screened and unscreened patients at age 6 years. *Pediatrics* 2009;124:e241-8. doi:<http://dx.doi.org/10.1542/peds.2008-0586>.
- [40] Tu W, He J, Dai F, Wang X, Li Y. Impact of Inborn Errors of Metabolism on Admission in a Neonatal Intensive Care Unit—A Prospective Cohort Study. *Indian J Pediatr* 2012;79:494–500. doi:10.1007/s12098-011-0464-3.
- [41] Goel H, Lusher A, Boneh A. Pediatric Mortality Due to Inborn Errors of Metabolism in Victoria, Australia: A Population-Based Study. *JAMA* 2010;304:1070. doi:10.1001/jama.2010.1259.
- [42] Meikle PJ, Ranieri E, Ravenscroft EM, Hua CT, Brooks DA, Hopwood JJ. Newborn screening for lysosomal storage disorders. *Southeast Asian J Trop Med Public Heal* 1999;30 Suppl 2:104–10.
- [43] Malm G, Lund AM, Mansson JE, Heiberg A. Mucopolysaccharidoses in the Scandinavian countries: incidence and prevalence.[Erratum appears in *Acta Paediatr*. 2008 Dec;97(12):1773]. *Acta Paediatr* 2008;97:1577–81. doi:<http://dx.doi.org/10.1111/j.1651-2227.2008.00965.x>.
- [44] Mechtler TP, Stary S, Metz TF, De Jesus VR, Greber-Platzer S, Pollak A, et al. Neonatal screening for lysosomal storage disorders:

feasibility and incidence from a nationwide study in Austria. *Lancet* 2012;379:335–41. doi:[http://dx.doi.org/10.1016/S0140-6736\(11\)61266-X](http://dx.doi.org/10.1016/S0140-6736(11)61266-X).

- [45] Poupetova H, Ledvinova J, Berna L, Dvorakova L, Kozich V, Elleder M. The birth prevalence of lysosomal storage disorders in the Czech Republic: comparison with data in different populations. *J Inher Metab Dis* 2010;33:387–96. doi:<http://dx.doi.org/10.1007/s10545-010-9093-7>.
- [46] Ibarra-González I, Fernández-Lainez C, Reyes-González D, Belmont-Martínez L, Guillén-López S, Monroy-Santoyo S, et al. Inborn Errors of Intermediary Metabolism in Critically Ill Mexican Newborns. *J Inborn Errors Metab Screen* 2014;2:232640981452964. doi:10.1177/2326409814529649.
- [47] Castro-Gago M, Blanco-Barca MO, Campos-Gonzalez Y, Arenas-Barbero J, Pintos-Martinez E, Eiris-Punal J. Epidemiology of pediatric mitochondrial respiratory chain disorders in northwest Spain. *Pediatr Neurol* 2006;34:204–11.
- [48] Bonkowsky JL, Nelson C, Kingston JL, Filloux FM, Mundorff MB, Srivastava R. The burden of inherited leukodystrophies in children. *Neurology* 2010;75:718–25. doi:<http://dx.doi.org/10.1212/WNL.0b013e3181eee46b>.
- [49] Suzuki Y, Shimozawa N, Yajima S, Inoue K, Orii T, Kondo N. Incidence of peroxisomal disorders in Japan. *Jpn J Hum Genet* 1996;41:167–75.
